# Supplementary material
Source: publisher figshare collection journal article supplement (https://geolsoc.figshare.com/ndownloader/files/28009487)
Supplement: Supplementary file 1 [file 28009487]

**Figure S1.** Combined LA-ICP-MS dating results and CL-images of Permian rocks

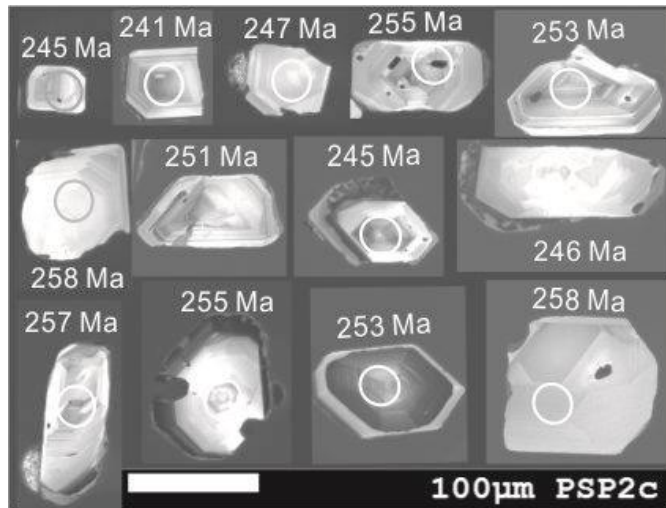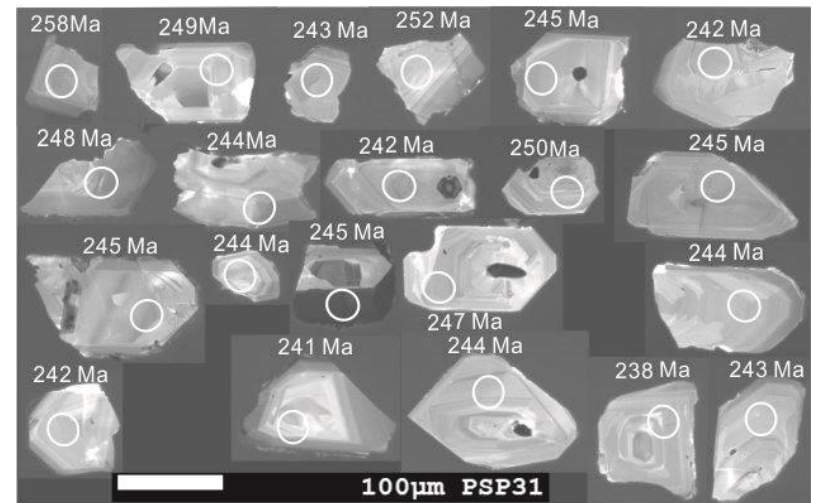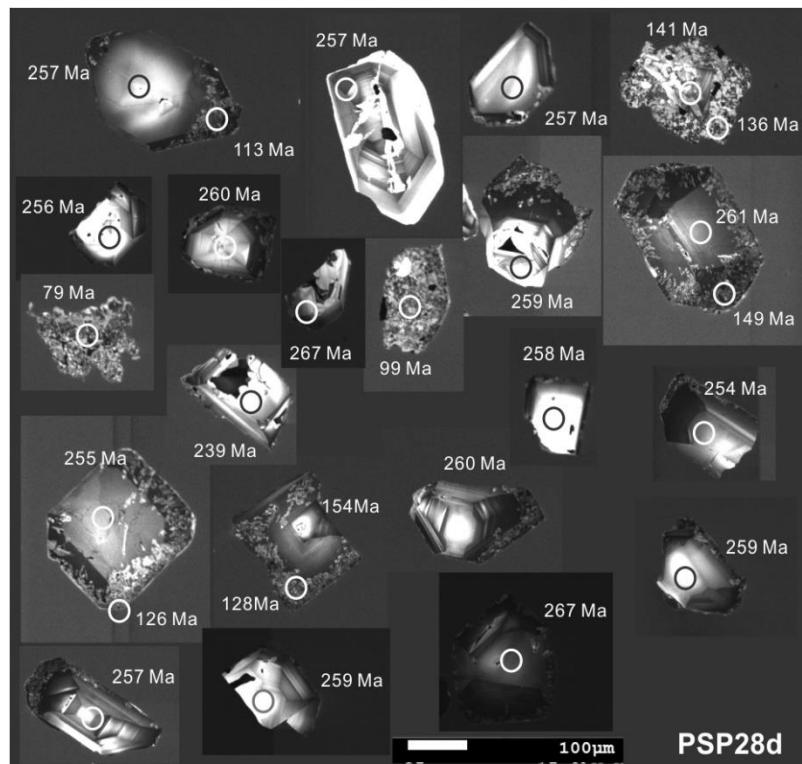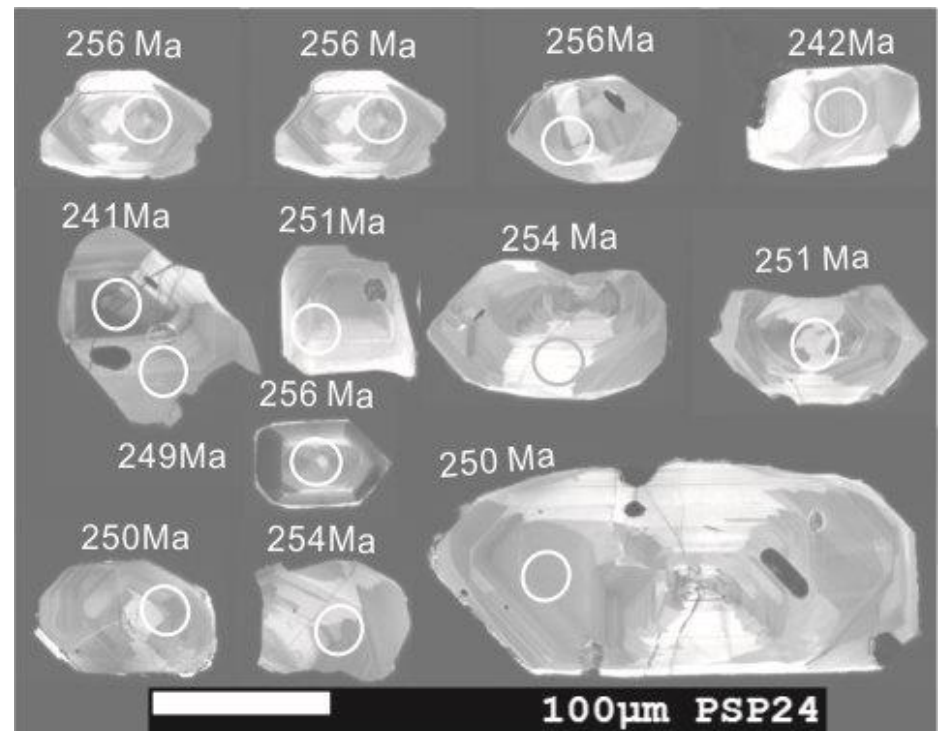

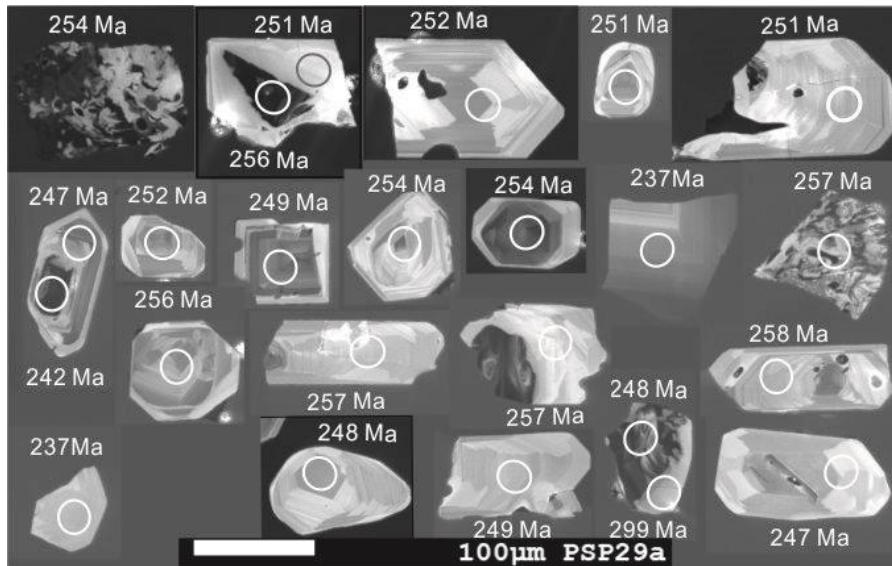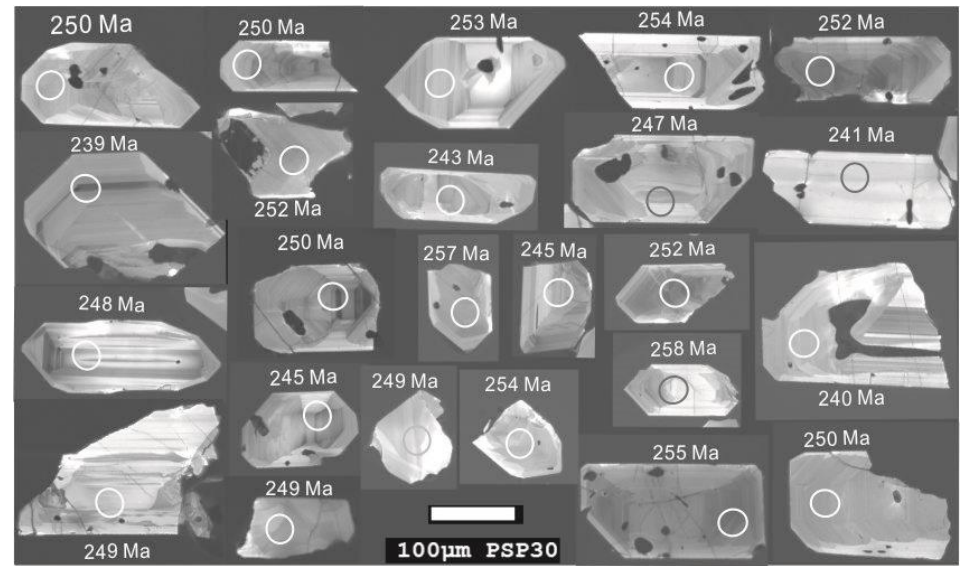

**Note:**

Sample PSP2c: Muong Hum granite

Sample 31: Phu Sa Phin granite

Sample PSP28d: Nam Xe – Tam Duong granite

Samples PSP24, PSP29a, and PSP30: Tu Le rhyolites
